# Supplementary material for: Development of FRET Biosensor to Characterize CSK Subcellular Regulation
Source: Biosensors (Basel). 2024 Apr 20;14(4):206. doi: 10.3390/bios14040206 (PMC11048185; doi:10.3390/bios14040206)
Supplement: Supplementary file 1 [file biosensors-14-00206-s001.zip]

Archive with 5 entries (5 files):
- biosensors-2936291-supplementary.pdf
- Movie S1.avi
- Movie S2.avi
- Movie S3.avi
- Movie S4.avi
